# Supplementary material for: XPO1 inhibition by selinexor induces potent cytotoxicity against high grade bladder malignancies
Source: PubMed Central journal article supplement (PMC6195388; doi:10.18632/oncotarget.26179), 2018-10-02
Supplement: oncotarget-09-34567-s001.pdf [file oncotarget-09-34567-s001.pdf]

# XPO1 inhibition by selinexor induces potent cytotoxicity against high grade bladder malignancies

## SUPPLEMENTARY MATERIALS

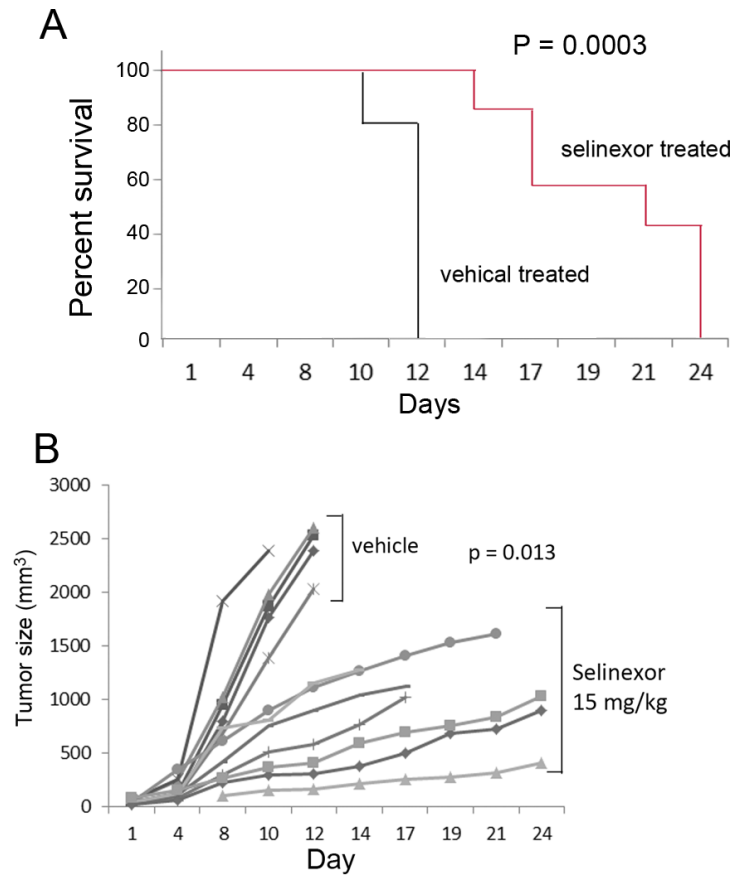

Supplementary Figure 1: (A) Kaplan–Meier survival analysis. (B) Growth curves of individual tumors.

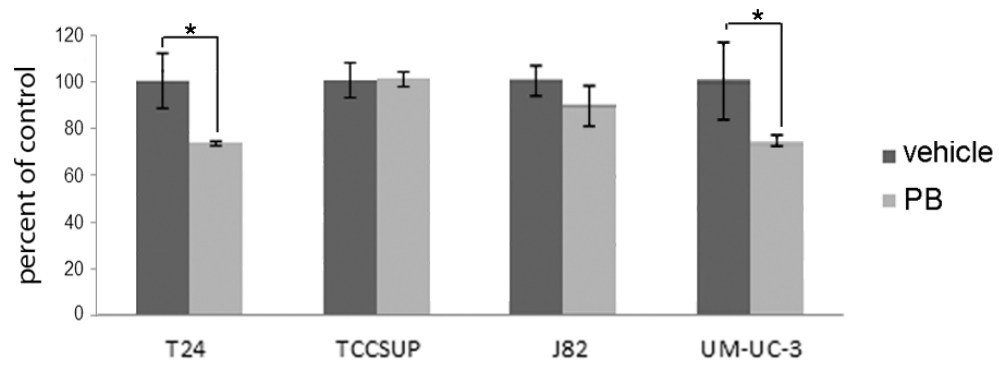

**Supplementary Figure 2: CDK4/6 inhibitor Palbociclib reduces viability of T24 and UM-UC-3 cells.** Cells were treated with 0.5  $\mu\text{m}$  PB or vehicle control for 3 d.
